# Supplementary material for: Color Stability of Orthodontic Ceramic Brackets and Adhesives in Potentially Staining Beverages—In Vitro Study
Source: MDPI journal article supplement (doi:10.3390/dj10070115), 2022-06-22
Supplement: s1 [file s1]

Table S1. Means and standard deviations of L\* value of L\*, a\*, b\* (LAB) color scale for ceramic brackets, according to the solution over time

| L parameter     |    | Coca Cola                   | Coffee                      | Vitamin drink               | Control                     |
|-----------------|----|-----------------------------|-----------------------------|-----------------------------|-----------------------------|
| QuickKlear® III | T0 | 65.73 ± 3.68 <sup>a b</sup> | 58.56 ± 1.12 <sup>a b</sup> | 66.1 ± 2.62 <sup>a b</sup>  | 67.26 ± 1.31 <sup>a b</sup> |
|                 | T1 | 59.35 ± 3.33 <sup>a b</sup> | 51.95 ± 1.23 <sup>a b</sup> | 66.55 ± 2.95 <sup>a b</sup> | 65.35 ± 0.81 <sup>a b</sup> |
|                 | T2 | 51.15 ± 1.07 <sup>a b</sup> | 42.71 ± 1.24 <sup>a b</sup> | 66.78 ± 3.25 <sup>a b</sup> | 65.16 ± 1.13 <sup>a b</sup> |
|                 | T3 | 49.86 ± 0.17 <sup>a b</sup> | 38.5 ± 2.53 <sup>a b</sup>  | 59.95 ± 3.09 <sup>a b</sup> | 71.74 ± 4.2 <sup>a b</sup>  |
|                 | T4 | 48.93 ± 1.35 <sup>a b</sup> | 36.38 ± 0.62 <sup>a b</sup> | 48.76 ± 0.86 <sup>a b</sup> | 69.15±2.08 <sup>a b</sup>   |
| ClearViz+Mini   | T0 | 96.27 ± 2.85 <sup>a c</sup> | 96.13 ± 2.95 <sup>a b</sup> | 96.66 ± 2.3 <sup>a</sup>    | 96.6 ± 2.13 <sup>a c</sup>  |
|                 | T1 | 95.21 ± 0.36 <sup>a c</sup> | 94.44 ± 1.45 <sup>a c</sup> | 99.34 ± 0.97 <sup>a c</sup> | 97.39 ± 0.87 <sup>a c</sup> |
|                 | T2 | 94.15 ± 0.19 <sup>a c</sup> | 83.26 ± 0.93 <sup>a</sup>   | 95.72 ± 0.24 <sup>a b</sup> | 97.39 ± 1.52 <sup>a</sup>   |
|                 | T3 | 94.32 ± 1.57 <sup>a c</sup> | 78.87 ± 1.03 <sup>a</sup>   | 93.47 ± 1.53 <sup>a c</sup> | 96.47 ± 1.6 <sup>a</sup>    |
|                 | T4 | 92.09 ± 0.49 <sup>a c</sup> | 78.17 ± 2.94 <sup>a</sup>   | 92.41 ± 1.59 <sup>a c</sup> | 96.93 ± 0.79 <sup>a c</sup> |
| Chic.           | T0 | 83.65 ± 0.64 <sup>c</sup>   | 83.66 ± 3.33 <sup>b</sup>   | 83.79 ± 0.98                | 86.44 ± 1.66                |
|                 | T1 | 84.17 ± 0.54 <sup>c</sup>   | 83.27 ± 0.86 <sup>c</sup>   | 83.23 ± 0.70 <sup>c</sup>   | 86.79 ± 0.49                |
|                 | T2 | 84.4 ± 0.49                 | 79.51 ± 0.77                | 82.21 ± 0.58 <sup>b</sup>   | 84.29 ± 0.29                |
|                 | T3 | 84.53 ± 0.24                | 74.39 ± 2.03                | 80.2 ± 1.1 <sup>c</sup>     | 83.23 ± 0.13                |
|                 | T4 | 85.41 ± 0.63                | 67.75 ± 0.71                | 76.06 ± 0.51 <sup>c</sup>   | 85.48 ± 0.76                |
| Vapor™          | T0 | 91.67 ± 0.74 <sup>b</sup>   | 90.25 ± 0.26 <sup>b</sup>   | 92.1 ± 0.14 <sup>b c</sup>  | 93.44 ± 0.78 <sup>b</sup>   |
|                 | T1 | 90.83 ± 0.12 <sup>b</sup>   | 90.13 ± 0.42 <sup>b</sup>   | 91.27 ± 0.31 <sup>b c</sup> | 91.83 ± 0.92 <sup>b</sup>   |
|                 | T2 | 90.11 ± 0.32 <sup>b</sup>   | 81.43 ± 2.02 <sup>b</sup>   | 90.52 ± 0.82 <sup>b</sup>   | 92.13 ± 2.2 <sup>b</sup>    |
|                 | T3 | 90.31 ± 0.2 <sup>b</sup>    | 75.85 ± 1.57                | 90.09 ± 0.46 <sup>b c</sup> | 96.68 ± 0.73 <sup>b</sup>   |
|                 | T4 | 89.8 ± 0.15 <sup>b</sup>    | 74.38 ± 0.49                | 89.55 ± 0.57 <sup>b</sup>   | 93.71 ± 1.2 <sup>b</sup>    |
| 20/40™ Brackets | T0 | 85.07 ± 0.41                | 84.38 ± 0.33                | 85.28 ± 0.42                | 84.6 ± 0.37 <sup>c</sup>    |
|                 | T1 | 84.81 ± 0.41                | 83.79 ± 0.40                | 85.05 ± 0.5                 | 84.64 ± 0.76                |
|                 | T2 | 83.59 ± 0.73 <sup>c</sup>   | 79.29 ± 0.26                | 84.47 ± 0.29                | 84.34 ± 0.42                |
|                 | T3 | 83.06 ± 0.43 <sup>c</sup>   | 78.69 ± 0.36 <sup>b</sup>   | 83,12 ± 0,69                | 83.59 ± 0.58                |
|                 | T4 | 82.64 ± 0.35 <sup>c</sup>   | 77.32 ± 0.22 <sup>b</sup>   | 81,57 ± 0,40                | 83.38 ± 0.74 <sup>c</sup>   |

Table S2. Means and standard deviations of a\* value of L\*, a\*, b\* (LAB) color scale for ceramic brackets, according to the solution over time

| a parameter     |    | Coca Cola                   | Coffee                      | Vitamin drink              | Control                     |
|-----------------|----|-----------------------------|-----------------------------|----------------------------|-----------------------------|
| QuicKlear® III  | T0 | 0.24 ± 0.07 <sup>a</sup>    | 0.59 ± 0.07                 | 0.17 ± 0.38 <sup>a</sup>   | -0.24 ± 0.37 <sup>a b</sup> |
|                 | T1 | -0.2 ± 0.25 <sup>a</sup>    | 1.08 ± 0.24 <sup>a</sup>    | 0.57 ± 0.26 <sup>a</sup>   | 0.89 ± 0.89                 |
|                 | T2 | -0.05 ± 0.54                | 1.45 ± 0.31                 | 0.87 ± 0.15                | 0.4 ± 0.1                   |
|                 | T3 | 0.2 ± 0.11                  | 2.51 ± 0.39                 | 1.05 ± 0.34                | 0.01 ± 0.31 <sup>a b</sup>  |
|                 | T4 | -0.11 ± 0.04 <sup>a c</sup> | 2.34 ± 0.37 <sup>a</sup>    | 0.57 ± 0.2                 | 0.22 ± 0.18 <sup>a b</sup>  |
| ClearViz+Mini   | T0 | 0.13 ± 0.2 <sup>b c</sup>   | 0.47 ± 0.23                 | 0.25 ± 0.05 <sup>b</sup>   | 0.23 ± 0.1 <sup>c</sup>     |
|                 | T1 | 0.23 ± 0.05 <sup>b</sup>    | 0.92 ± 0.08 <sup>b</sup>    | 0.75 ± 0.23 <sup>b</sup>   | 0.68 ± 0.12                 |
|                 | T2 | 0.36 ± 0.04                 | 1.17 ± 0.39 <sup>a</sup>    | 0.37 ± 0.04 <sup>a</sup>   | 0.37 ± 0.09                 |
|                 | T3 | 0.71 ± 0.06                 | 4.22 ± 0.26 <sup>a</sup>    | 0.91 ± 0.1                 | 0.22 ± 0.02 <sup>c</sup>    |
|                 | T4 | 0.19 ± 0.01                 | 4.29 ± 0.31                 | 1.45 ± 0.81                | 0.28 ± 0.06 <sup>c d</sup>  |
| Chic.           | T0 | 1.18 ± 0.19 <sup>a b</sup>  | 2.27 ± 0.55 <sup>a</sup>    | 1.52 ± 0.45 <sup>a b</sup> | 1.25 ± 0.21 <sup>a</sup>    |
|                 | T1 | 0.97 ± 0.51                 | 2.67 ± 0.22                 | 2.2 ± 0.43 <sup>a b</sup>  | 0.46 ± 0.03 <sup>a</sup>    |
|                 | T2 | 1.22 ± 0.72 <sup>a</sup>    | 2.34 ± 0.2 <sup>b</sup>     | 2.11 ± 0.1 <sup>a b</sup>  | -0.09 ± 0.23 <sup>a</sup>   |
|                 | T3 | 0.34 ± 0.66                 | 4.52 ± 0.72 <sup>b</sup>    | 1.95 ± 0.11 <sup>a b</sup> | 0.83 ± 0.05 <sup>a</sup>    |
|                 | T4 | 0.65 ± 0.27 <sup>b</sup>    | 4.52 ± 0.36                 | 2.23 ± 0.06 <sup>a b</sup> | 1.07 ± 0.11 <sup>a c</sup>  |
| Vapor™          | T0 | 1.01 ± 0.22 <sup>c</sup>    | 0.71 ± 0.04 <sup>b</sup>    | 0.69 ± 0.11                | 1.73 ± 0.31 <sup>b c</sup>  |
|                 | T1 | 1.24 ± 0.05                 | 1.03 ± 0.07 <sup>c</sup>    | 0.7 ± 0.07                 | 1.19 ± 0.17 <sup>a</sup>    |
|                 | T2 | 0.83 ± 0.42 <sup>b</sup>    | 0.63 ± 0.05 <sup>b c</sup>  | 0.61 ± 0.1                 | 1.16 ± 0.2 <sup>a</sup>     |
|                 | T3 | 1.19 ± 0.47 <sup>a</sup>    | 1.09 ± 0.12 <sup>a b</sup>  | 0.2 ± 0.0 <sup>a</sup>     | 1.21 ± 0.08 <sup>b c</sup>  |
|                 | T4 | 1.33 ± 0.04 <sup>a c</sup>  | 1.86 ± 0.12 <sup>b</sup>    | 0.45 ± 0.1 <sup>a</sup>    | 1.29 ± 0.29 <sup>b d</sup>  |
| 20/40™ Brackets | T0 | 0.6 ± 0.07 <sup>a</sup>     | 0.16 ± 0.22 <sup>a b</sup>  | -0.3 ± 1.5                 | 0.56 ± 0.04                 |
|                 | T1 | 2.12 ± 0.22 <sup>b</sup>    | 3.7 ± 0.10 <sup>a b c</sup> | 0.6 ± 0.64                 | 0.6 ± 0.0                   |
|                 | T2 | -2.63 ± 0.58 <sup>a b</sup> | 3.59 ± 0.44 <sup>a c</sup>  | 0.08 ± 0.44 <sup>b</sup>   | 0.45 ± 0.04                 |
|                 | T3 | -3.24 ± 0.44 <sup>a</sup>   | 3.31 ± 0.33                 | -0.94 ± 0.59 <sup>b</sup>  | 0.5 ± 0.1                   |
|                 | T4 | -3.6 ± 0.45 <sup>b c</sup>  | 6.32 ± 0.48 <sup>a b</sup>  | 0.24 ± 0.36 <sup>b</sup>   | 0.5 ± 0.1                   |

Table S3. Means and standard deviations of b\* value of L\*, a\*, b\* (LAB) color scale for ceramic brackets, according to the solution over time

| b parameter     |    | Coca Cola                  | Coffee                      | Vitamin drink               | Control                     |
|-----------------|----|----------------------------|-----------------------------|-----------------------------|-----------------------------|
| QuickKlear® III | T0 | 2.47 ± 0.07                | 3.13 ± 0,17 <sup>a b</sup>  | 3.6 ± 0.20 <sup>a b</sup>   | 2.09 ± 0.5                  |
|                 | T1 | 3.55 ± 0.2                 | 6.75 ± 1,89                 | 5.75 ± 0.69 <sup>a</sup>    | 2.7 ± 0.36                  |
|                 | T2 | 5.47 ± 0.46 <sup>a</sup>   | 8.0 ± 1,12 <sup>a</sup>     | 6.24 ± 0.39 <sup>a</sup>    | 2.78 ± 0.07                 |
|                 | T3 | 5.81 ± 0.05 <sup>a b</sup> | 9.85 ± 0,64                 | 5.55 ± 0.52 <sup>a b</sup>  | 2.97 ± 0.25                 |
|                 | T4 | 5.75 ± 0.67 <sup>a b</sup> | 9.91 ± 0,12                 | 5.93 ± 0.1 <sup>a b</sup>   | 2.93 ± 0.28                 |
| ClearViz+Mini   | T0 | 2.23 ± 0.34                | 1.5 ± 0,39 <sup>a</sup>     | 1.96 ± 0.09 <sup>a</sup>    | 2.19 ± 0.29                 |
|                 | T1 | 2.11 ± 0.2 <sup>a</sup>    | 4.43 ± 1,02                 | 5.78 ± 0.45                 | 5.1 ± 0.43 <sup>a</sup>     |
|                 | T2 | 2.21 ± 0.24 <sup>a b</sup> | 6.81 ± 1,82                 | 5.59 ± 0.07 <sup>b</sup>    | 3.13 ± 0.29                 |
|                 | T3 | 2.04 ± 0.29 <sup>a c</sup> | 9.77 ± 1,18                 | 10.62 ± 0.32                | 1.43 ± 0.1 <sup>a b c</sup> |
|                 | T4 | 2.99 ± 0.56 <sup>a c</sup> | 9.33 ± 0,66 <sup>a</sup>    | 10.13 ± 1.11                | 2.29 ± 0.18 <sup>a b</sup>  |
| Chic.           | T0 | 2.87 ± 0.31 <sup>a</sup>   | 2.4 ± 0,17                  | 2.45 ± 0.46                 | 2.97 ± 0.26 <sup>a b</sup>  |
|                 | T1 | 3.64 ± 0.68                | 11.33 ± 0,36 <sup>a</sup>   | 9.55 ± 0.81 <sup>a b</sup>  | 3.68 ± 0.08 <sup>b</sup>    |
|                 | T2 | 4.13 ± 0.42                | 11.31 ± 0,33 <sup>b c</sup> | 11.16 ± 1.21 <sup>b c</sup> | 2.69 ± 0.11                 |
|                 | T3 | 3.97 ± 0.47 <sup>b</sup>   | 16.88 ± 2,0 <sup>a</sup>    | 11.13 ± 0.77 <sup>a</sup>   | 3.37 ± 0.16 <sup>a</sup>    |
|                 | T4 | 4.23 ± 0.15 <sup>b</sup>   | 18.43 ± 0,96 <sup>a b</sup> | 11.36 ± 0.45 <sup>a</sup>   | 3.08 ± 0.13                 |
| Vapor™          | T0 | 1.71 ± 0.23 <sup>a</sup>   | 1.31 ± 0,01 <sup>b</sup>    | 1.42 ± 0.1 <sup>b</sup>     | 1.89 ± 0.13 <sup>a</sup>    |
|                 | T1 | 3.19 ± 0.3 <sup>b</sup>    | 3.33 ± 0,09 <sup>a</sup>    | 6.35 ± 0.95                 | 2.03 ± 0.49 <sup>a</sup>    |
|                 | T2 | 4.12 ± 0.16                | 4.61 ± 0,1 <sup>a b</sup>   | 7.48 ± 0.36                 | 3.31 ± 0.44 <sup>b</sup>    |
|                 | T3 | 4.13 ± 0.04                | 10.99 ± 0,13 <sup>b</sup>   | 8.39 ± 0.14 <sup>c</sup>    | 3.34 ± 0.2 <sup>b</sup>     |
|                 | T4 | 4.43 ± 0.12                | 11.83 ± 0,5                 | 8.76 ± 0.11 <sup>c</sup>    | 3.28 ± 0.39 <sup>a</sup>    |
| 20/40™ Brackets | T0 | 2.45 ± 0.14                | 2.26 ± 0,27                 | 2.21 ± 0.33                 | 1.68 ± 0.25 <sup>b</sup>    |
|                 | T1 | 5.7 ± 0.3 <sup>a b</sup>   | 4.40 ± 0,10                 | 5.34 ± 0.14 <sup>b</sup>    | 3.12 ± 0.09                 |
|                 | T2 | 5.45 ± 0.18 <sup>b</sup>   | 5.5 ± 0,1 <sup>c</sup>      | 11.77 ± 0.94 <sup>a c</sup> | 3.2 ± 0.19                  |
|                 | T3 | 5.4 ± 0.1 <sup>c</sup>     | 7.52 ± 0,57 <sup>a b</sup>  | 13.61 ± 1.62 <sup>b c</sup> | 3.41 ± 0.21 <sup>c</sup>    |
|                 | T4 | 5.71 ± 0.11 <sup>c</sup>   | 9.32 ± 0,08 <sup>b</sup>    | 14.04 ± 1.55 <sup>b c</sup> | 3.25 ± 0.2 <sup>b</sup>     |

Table S4. Means and standard deviations of L\* value of L\*, a\*, b\* (LAB) color scale for adhesive samples, according to the solution over time

| L parameter                       |    | Coca Cola                 | Coffee                    | Vitamin drink             | Control                   |
|-----------------------------------|----|---------------------------|---------------------------|---------------------------|---------------------------|
| Transbond™ XT                     | T0 | 74.35 ± 0.55 <sup>a</sup> | 73.87 ± 0.16              | 74.57 ± 0.26 <sup>a</sup> | 67.55 ± 0.11 <sup>a</sup> |
|                                   | T1 | 71.97 ± 0.94 <sup>a</sup> | 67.48 ± 0.29 <sup>a</sup> | 71.05 ± 0.66 <sup>a</sup> | 70.55 ± 0.65 <sup>a</sup> |
|                                   | T2 | 69.91 ± 0.25 <sup>a</sup> | 64.74 ± 1.55              | 69.21 ± 0.81 <sup>a</sup> | 71.45 ± 0.74 <sup>a</sup> |
|                                   | T3 | 68.36 ± 0.46 <sup>a</sup> | 55.99 ± 1.19 <sup>a</sup> | 70.26 ± 0.36 <sup>a</sup> | 70.96 ± 0.39 <sup>a</sup> |
|                                   | T4 | 60.63 ± 0.95 <sup>a</sup> | 50.67 ± 0.61 <sup>a</sup> | 70.63 ± 0.53 <sup>a</sup> | 72.01 ± 0.09 <sup>a</sup> |
| BracePaste® adhesive color change | T0 | 75.41 ± 0.1               | 74.26 ± 1.16 <sup>a</sup> | 75.67 ± 0.03              | 74.97 ± 0.78              |
|                                   | T1 | 74.47 ± 0.44              | 68.1 ± 0.47               | 75.21 ± 0.18              | 75.06 ± 0.31              |
|                                   | T2 | 70.11 ± 0.27              | 69.01 ± 0.2               | 73.99 ± 0.07              | 75.54 ± 0.29              |
|                                   | T3 | 69.63 ± 0.43              | 64.5 ± 0.78               | 74.36 ± 0.22              | 74.8 ± 1.16               |
|                                   | T4 | 69.47 ± 0.23              | 65.14 ± 0.4               | 71.82 ± 0.4               | 76.89 ± 0.23              |
| BracePaste® adhesive              | T0 | 81.94 ± 0.07 <sup>a</sup> | 81.16 ± 0.5 <sup>a</sup>  | 81.89 ± 0.11 <sup>a</sup> | 81.7 ± 0.41 <sup>a</sup>  |
|                                   | T1 | 80.16 ± 0.16 <sup>a</sup> | 73.15 ± 0.37 <sup>a</sup> | 80.98 ± 0.24 <sup>a</sup> | 89.52 ± 0.75 <sup>a</sup> |
|                                   | T2 | 77.22 ± 0.11 <sup>a</sup> | 74.82 ± 1.1 <sup>a</sup>  | 80.14 ± 0.05 <sup>a</sup> | 80.23 ± 0.22 <sup>a</sup> |
|                                   | T3 | 76.66 ± 0.13 <sup>a</sup> | 72.97 ± 0.07 <sup>a</sup> | 76.13 ± 1.25 <sup>a</sup> | 79.58 ± 1.45 <sup>a</sup> |
|                                   | T4 | 72.88 ± 0.28 <sup>a</sup> | 68.74 ± 0.23 <sup>a</sup> | 76.49 ± 0.42 <sup>a</sup> | 79.96 ± 1.37 <sup>a</sup> |

Table S5. Means and standard deviations of a\* value of L\*, a\*, b\* (LAB) color scale for adhesive samples, according to the solution over time

| a parameter                       |    | Coca Cola                 | Coffee                    | Vitamin drink              | Control                   |
|-----------------------------------|----|---------------------------|---------------------------|----------------------------|---------------------------|
| Transbond™ XT                     | T0 | 0.78 ± 0.13 <sup>a</sup>  | 0.76 ± 0.12               | 0.91 ± 0.04 <sup>a</sup>   | 0.82 ± 0.05 <sup>a</sup>  |
|                                   | T1 | 0.89 ± 0.71               | 1.43 ± 0.21               | 2.14 ± 0.74 <sup>a</sup>   | -0.06 ± 0.25              |
|                                   | T2 | 0.63 ± 0.08               | 1.24 ± 0.36               | 1.93 ± 0.09 <sup>a</sup>   | 1.25 ± 1.28 <sup>a</sup>  |
|                                   | T3 | 0.76 ± 0.22               | 3.89 ± 0.18 <sup>a</sup>  | 1.51 ± 0.59 <sup>a b</sup> | 0.84 ± 0.14 <sup>a</sup>  |
|                                   | T4 | 1.29 ± 0.21               | 3.91 ± 0.14 <sup>a</sup>  | 1.57 ± 0.42                | 0.89 ± 0.02 <sup>a</sup>  |
| BracePaste® adhesive color change | T0 | 0.43 ± 0.07               | 1.08 ± 0.44 <sup>a</sup>  | 0.46 ± 0.05                | 0.13 ± 0.06               |
|                                   | T1 | 1.67 ± 0.03 <sup>a</sup>  | 2.78 ± 0.1 <sup>a</sup>   | 1.89 ± 0.05                | 0.7 ± 0.09 <sup>a</sup>   |
|                                   | T2 | 1.67 ± 0.06 <sup>a</sup>  | 2.41 ± 0.07 <sup>a</sup>  | 1.79 ± 0.02                | 0.4 ± 0.09                |
|                                   | T3 | 2.24 ± 0.08 <sup>a</sup>  | 3.53 ± 0.52               | 1.44 ± 0.14 <sup>b</sup>   | 0.02 ± 0.12               |
|                                   | T4 | 2.24 ± 0.05 <sup>a</sup>  | 3.62 ± 0.2                | 1.86 ± 0.04 <sup>a</sup>   | -0.06 ± 0.11              |
| BracePaste® adhesive              | T0 | -3.79 ± 1.9               | -4.59 ± 0.2 <sup>a</sup>  | -4.8 ± 0 <sup>a</sup>      | -4.99 ± 0.11 <sup>a</sup> |
|                                   | T1 | -4.38 ± 0.02 <sup>a</sup> | -2.9 ± 0.3 <sup>a</sup>   | -2.76 ± 0.28 <sup>a</sup>  | -4.48 ± 0.11 <sup>a</sup> |
|                                   | T2 | -3.71 ± 0.07 <sup>a</sup> | -1.57 ± 0.23 <sup>a</sup> | -2.84 ± 0.26 <sup>a</sup>  | -2.97 ± 0.15 <sup>a</sup> |
|                                   | T3 | -3.1 ± 0.1 <sup>a</sup>   | -2.08 ± 0.04 <sup>a</sup> | -1.31 ± 0.31 <sup>a</sup>  | -3.67 ± 0.66 <sup>a</sup> |
|                                   | T4 | -2.18 ± 0.11 <sup>a</sup> | -1.19 ± 0.08 <sup>a</sup> | -0.86 ± 0.02 <sup>a</sup>  | -3.06 ± 1.58 <sup>a</sup> |

Table S6. Means and standard deviations of b\* value of L\*, a\*, b\* (LAB) color scale for adhesive samples, according to the solution over time

| b parameter                             |    | Coca Cola                 | Coffee                    | Vitamin drink             | Control                    |
|-----------------------------------------|----|---------------------------|---------------------------|---------------------------|----------------------------|
| Transbond™ XT                           | T0 | 0.82 ± 0.55 <sup>a</sup>  | 12.03 ± 0.05 <sup>a</sup> | 0.78 ± 0.13 <sup>a</sup>  | 0.91 ± 0.04 <sup>a b</sup> |
|                                         | T1 | 8.34 ± 1.56 <sup>a</sup>  | 12.03 ± 0.05 <sup>a</sup> | 10.43 ± 2.29              | 4.68 ± 0.98                |
|                                         | T2 | 7.34 ± 0.38 <sup>a</sup>  | 11.63 ± 0.89 <sup>a</sup> | 12.79 ± 0.71              | 6.2 ± 0.21 <sup>a</sup>    |
|                                         | T3 | 4.83 ± 0.94 <sup>a</sup>  | 21.29 ± 0.65              | 15.17 ± 0.51 <sup>a</sup> | 5.97 ± 0.63 <sup>a</sup>   |
|                                         | T4 | 2.89 ± 0.38 <sup>a</sup>  | 18.56 ± 0.47 <sup>a</sup> | 14.59 ± 0.62 <sup>a</sup> | 4.8 ± 0.08 <sup>a</sup>    |
| BracePaste®<br>adhesive<br>color change | T0 | 7.56 ± 0.22 <sup>a</sup>  | 9.99 ± 1.76 <sup>a</sup>  | 7.7 ± 0.09 <sup>a</sup>   | 6.04 ± 0.5 <sup>a</sup>    |
|                                         | T1 | 18.99 ± 0.44 <sup>a</sup> | 24.27 ± 0.56 <sup>a</sup> | 20.22 ± 0.42 <sup>a</sup> | 6.27 ± 0.47                |
|                                         | T2 | 20.23 ± 2.44 <sup>a</sup> | 28.83 ± 0.43 <sup>a</sup> | 19.36 ± 0.25 <sup>a</sup> | 14.67 ± 0.5 <sup>a</sup>   |
|                                         | T3 | 23.39 ± 0.32 <sup>a</sup> | 28.67 ± 1.73 <sup>a</sup> | 28.67 ± 0.3 <sup>a</sup>  | 14.63 ± 0.59 <sup>a</sup>  |
|                                         | T4 | 26.71 ± 0.1 <sup>a</sup>  | 30.74 ± 0.49 <sup>a</sup> | 28.07 ± 0.49 <sup>a</sup> | 13.56 ± 0.53 <sup>a</sup>  |
| BracePaste®<br>adhesive                 | T0 | 5.69 ± 0.07               | 5.23 ± 0.85               | 5.88 ± 0.22               | 6.09 ± 0.5 <sup>b</sup>    |
|                                         | T1 | 8.83 ± 0.67               | 17.41 ± 0.85              | 9.87 ± 0.53 <sup>a</sup>  | 7.04 ± 0.33 <sup>a</sup>   |
|                                         | T2 | 11.38 ± 0.52              | 19.42 ± 0.93              | 11.47 ± 1.08 <sup>a</sup> | 11.6 ± 0.6                 |
|                                         | T3 | 9.49 ± 0.18               | 19.13 ± 0.03 <sup>a</sup> | 21.89 ± 0.44              | 8.2 ± 2.49                 |
|                                         | T4 | 18.61 ± 0.44              | 21.72 ± 0.37              | 23.78 ± 0.25              | 9.13 ± 2.24                |
